# Supplementary material for: Preparedness and Awareness Levels of Intensive Care and Operating Room Personnel for Disaster Situations: A Cross-Sectional Survey in a Tertiary Hospital
Source: Research Square preprint supplement (doi:10.21203/rs.3.rs-8030269/v1), 2025-11-28
Supplement: Supplementary file 1 [file 0ce624396149fee90711453e.docx]

**Improved Disaster Preparedness Questionnaire**

This questionnaire was developed and applied to assess the preparedness, knowledge levels, willingness, and psychosocial awareness of intensive care unit and operating room personnel regarding disaster situations. The full English translation is provided below.

## Section 1: Demographic Information

1. Gender: ☐ Female ☐ Male

2. Age: ☐ 18–39 ☐ 40–59 ☐ 60+

3. Profession: ☐ Physician ☐ Nurse ☐ Anesthesia Technician ☐ Other: …

4. Workplace: ☐ Intensive Care Unit ☐ Operating Room

5. Years in Profession (including training): ☐ 0–5 ☐ 6–10 ☐ 11–15 ☐ 16+

6. Years in Current Unit: ☐ 0–5 ☐ 6–10 ☐ 11–15 ☐ 16+

7. Have you ever worked in a disaster situation? ☐ Yes ☐ No

## Section 2: Disaster Training and Knowledge Level

8. What is the definition of a disaster?

a) Unexpected and sudden events

b) Only natural events

c) Only human-induced events

d) There is no definition of disaster

9. How do you learn about task distribution during a disaster?

a) From the disaster plan

b) From instructions given by senior management

c) By acting on my own initiative

d) I don’t know

10. What is the primary responsibility of ICU/OR units during a disaster?

a) Ensuring the safety of current patients

b) Prioritizing treatment of newly arrived patients

c) Checking medical supply stocks

d) Waiting for management decisions

11. How should patient evacuation be carried out during a disaster?

a) Patients are prioritized according to critical condition

b) Patients who can move independently are evacuated first

c) All patients are evacuated at once

d) I don’t know

12. Do you know if your hospital has a written Disaster Management Plan? ☐ Yes ☐ No ☐ Not sure

13. Participation in disaster training programs:

☐ I attended before and found it useful

☐ I attended before but did not find it useful

☐ I have never attended

☐ I plan to attend

14. Have you ever participated in a disaster drill?

☐ Yes (Answer Q16) ☐ No (Answer Q17) ☐ I don’t remember (Answer Q17)

15. Which topics were included in the disaster drill? (You may select more than one.)

☐ Patient evacuation processes

☐ Equipment and material management

☐ Communication and coordination

☐ Worker safety

☐ Other (please specify): …

16. Do you know the roles and responsibilities of ICU and OR staff during disasters?

☐ Yes ☐ Partially ☐ No

17. Do you have competency in using disaster response equipment?

☐ Yes ☐ No ☐ Partially ☐ I don’t know

## Section 3: Willingness and Preparedness for Disaster Response

18. Do you know how to act in your unit during a disaster?

☐ Yes, definitely ☐ Partially ☐ No

19. How willing do you feel to take responsibility during a disaster?

☐ Strongly unwilling ☐ Unwilling ☐ Undecided ☐ Willing ☐ Strongly willing

20. What is your main motivation for volunteering in disasters?

☐ Professional responsibility

☐ Desire to help people

☐ To improve my knowledge and skills

☐ Sense of obligation

☐ I do not want to volunteer

21. Which role would you prefer to take in a disaster?

☐ Medical intervention

☐ Triage

☐ Logistics (supplies, transport, shelter, security)

☐ Coordination and management

☐ Communication

☐ Providing psychosocial support

22. What is the main purpose of triage during a disaster?

a) Prioritize the first patient who arrives

b) Prioritize patients based on life-threatening conditions

c) Evacuate only ICU patients

d) Treat as many patients as possible simultaneously

23. How competent do you feel in disaster response?

☐ Not competent at all ☐ Incompetent ☐ Undecided ☐ Competent ☐ Highly competent

24. Have you considered joining disaster response teams (e.g., AFAD, UMKE, Red Crescent)?

☐ Yes, I am a member ☐ Yes, but not yet joined ☐ No

25. Are you willing to volunteer in the post-disaster recovery process?

☐ Yes ☐ No ☐ Undecided

26. Do you know how to communicate with your relatives outside the hospital during a disaster?

☐ Yes, I know alternative communication methods ☐ No

27. Do you know the basic precautions you should take for your own safety during a disaster?

☐ Yes ☐ Partially ☐ No

## Section 4: Awareness

28. Which of the following do you think is the most important step in disasters?

☐ Communication and information sharing

☐ Patient evacuation

☐ Equipment and material management

☐ Worker safety

29. Do you know the communication channels to be used in the hospital during disasters? ☐ Yes ☐ No

30. In which areas do you think you would face difficulties during a disaster? (You may select more than one.)

☐ Patient evacuation management

☐ Inter-team coordination

☐ Equipment and material shortages

☐ Lack of knowledge or training

☐ Other (please specify): …

## Section 5: Psychological and Social Factors

31. What is your biggest concern about participating in disaster response?

☐ My own safety

☐ The safety of my family

☐ Lack of adequate medical supplies and support

☐ Psychological effects after the disaster

☐ Other (please specify): …

32. Would you like to receive psychological support after a disaster? ☐ Yes ☐ No ☐ Not sure

33. What do you think is the greatest psychological burden for ICU and OR staff during a disaster?

☐ Stress experienced by patients and relatives

☐ Anxiety about not being able to provide adequate medical care

☐ Concern for one’s own safety

☐ Burnout due to long working hours

34. Who would be your main source of social support during a disaster?

☐ My colleagues

☐ My family and close circle

☐ Hospital management / administrators

☐ I think I would not receive any social support

35. What is the most important impact of disasters on healthcare services?

a) Exceeding hospital capacity

b) Shortage of electricity, water, and medical supplies

c) Staff burnout

d) All of the above
